# Supplementary material
Source: PubMed Central journal article supplement (PMC6933856)
Supplement: PRO-29-306-s001.pdf [file PRO-29-306-s001.pdf]

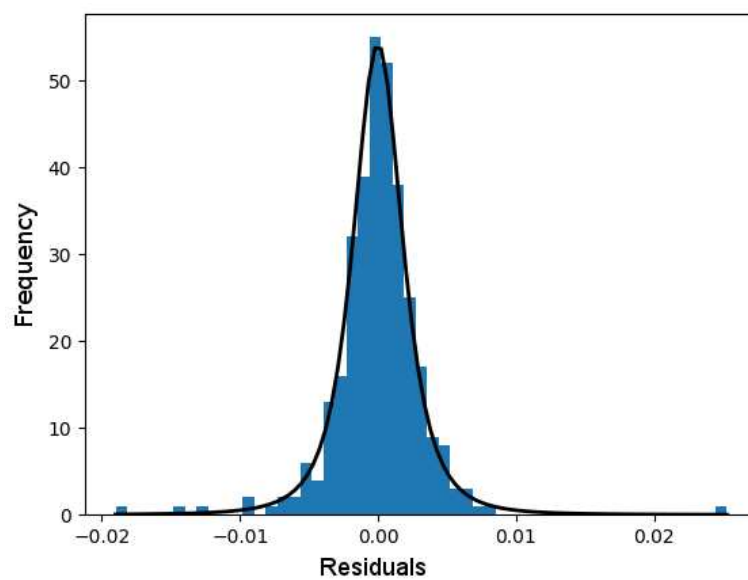

Figure S1: A histogram (blue) showing the distribution of amide proton chemical shift residuals in the example data (from all residues for which curvature is not detected, at all temperatures). A t distribution (black line) fit to these residuals is superimposed.
